# Supplementary material
Source: publisher figshare collection journal article supplement (https://springernature.figshare.com/ndownloader/files/7117898)

**High-fat diet**

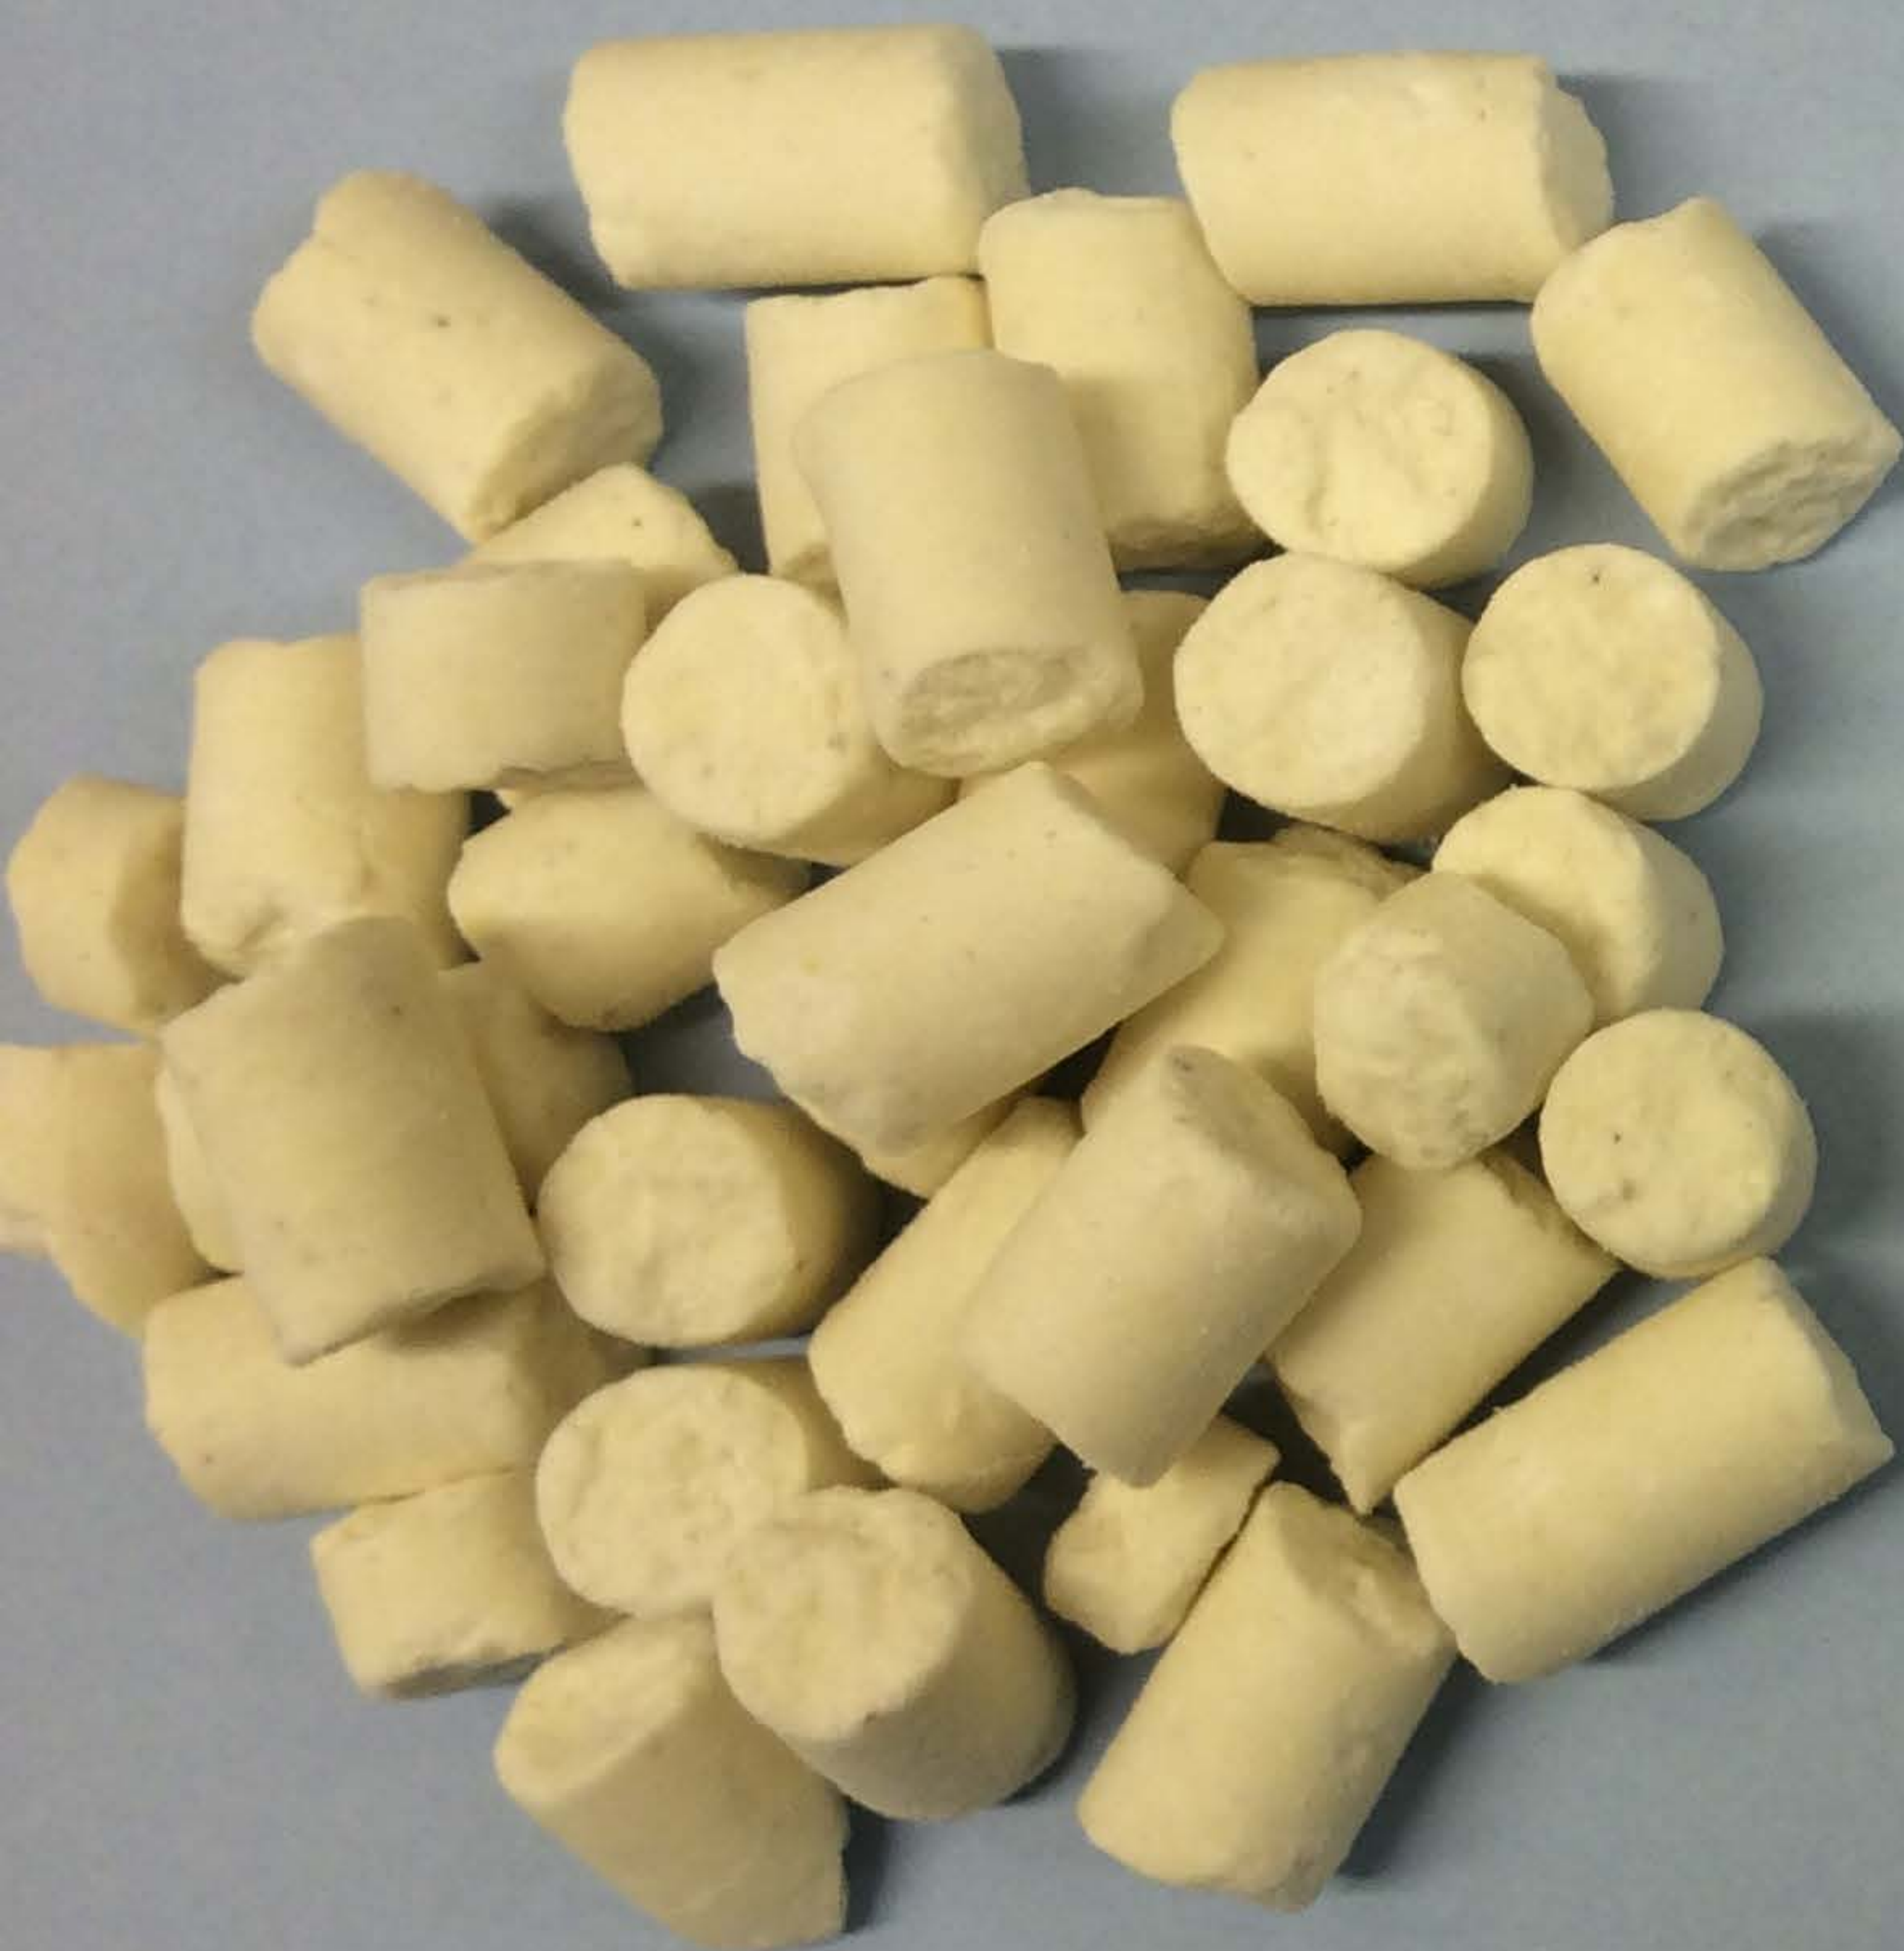

**Heat-treated high-fat diet**

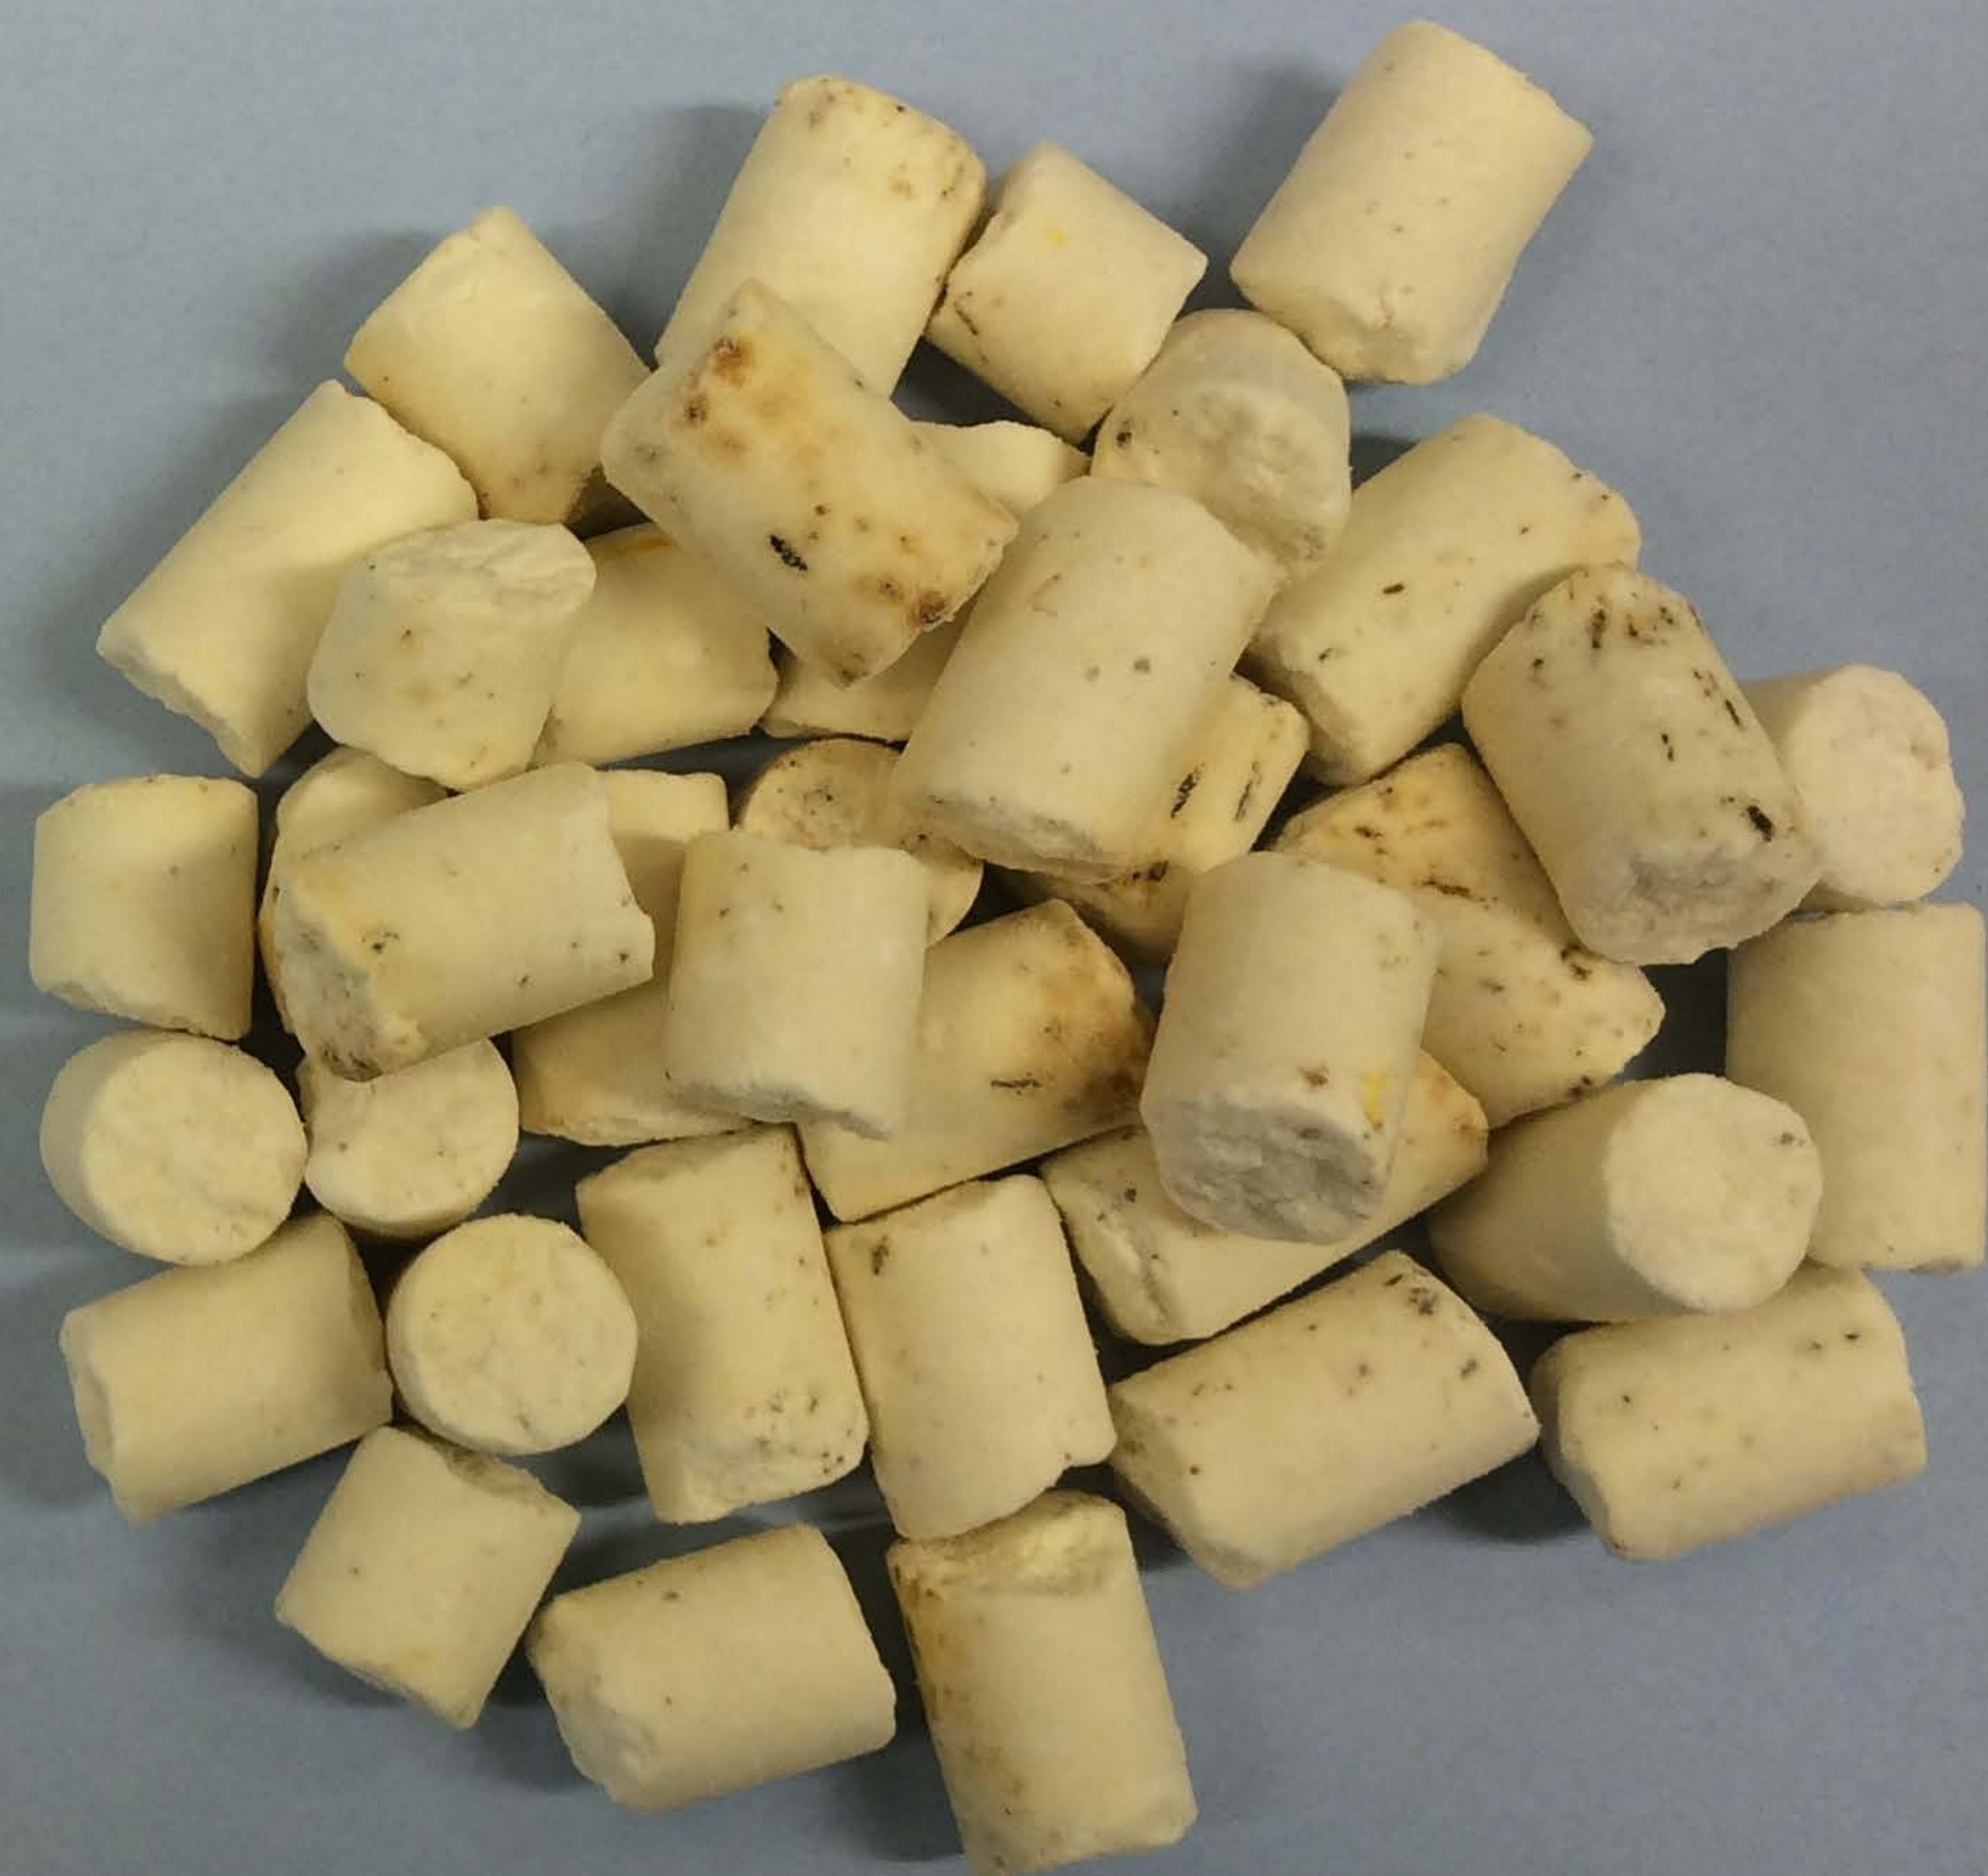

Supplement: Supplementary file [file 7117898]
